# Supplementary material for: Self-heterodyne spectroscopy via a non-uniformly spaced frequency comb
Source: Research Square preprint supplement (doi:10.21203/rs.3.rs-8387214/v1), 2026-01-21
Supplement: Supplementary file 1 [file d456df16ccca2d2a74c5810a.docx]

Supplementary Information for

# Self-heterodyne spectroscopy via a non-uniformly spaced frequency comb

Bofeng Zhang1,2†, Gang Zhao1,2*†, Xiaobin Zhou1,2, Xiaojuan Yan1,2, Jiaqi Yang1,2, Weiguang Ma1,2*, Suotang Jia1,2

1State Key Laboratory of Quantum Optics Technologies and Devices, Institute of Laser Spectroscopy; Shanxi University, Taiyuan, 030006, China.

2Collaborative Innovation Center of Extreme Optics; Shanxi University, Taiyuan, 030006, China.

*Corresponding author. Email: [gangzhao@sxu.edu.cn](mailto:gangzhao@sxu.edu.cn) (Gang Zhao); [mwg@sxu.edu.cn](mailto:mwg@sxu.edu.cn%20(W.M.)) (Weiguang Ma)

†These authors contributed equally to this work: Bofeng Zhang, Gang Zhao.

## Supplementary Note 1. Selection of modulation frequency

In the synthesis of a non-uniform optical frequency comb, the inter-tooth frequency intervals  *fk*  are freely configurable, provided they satisfy the constraints given in the main context.

To fully resolve the RF comb spectra in the frequency domain, the minimum frequency resolution must be equal to the greatest common divisor (GCD) of all *fk*. This requires a consecutive measurement of the beat notes over a duration *T*, expressed as:

The period *T* accords to the signal period of the RF comb in the time domain. Arbitrary selection of *fk* may lead to an excessively long period, necessitating prolonged acquisition time to capture a full cycle. This constraint fundamentally limits the system's capability for fast-response measurements.

To minimize the measurement time, it is advantageous to adopt uniform RF tooth spacings, i.e. Δ*fk* = Δ*f*, and simultaneously set *f*1 as integer multiple of Δ*f*, thereby generating a series of frequencies that follows an arithmetic progression. This configuration increases the GCD of the frequencies to Δ*f*, reducing the signal period to 1/Δ*f*, and thus enhancing the achievable measurement rate.

## Supplementary Note 2. Measurement of the linewidth of RF comb

In dual-comb spectroscopy (DCS), the mutual coherence of the two combs can be assessed by measuring the linewidth of these elements, in addition to evaluating the signal-to-noise ratio (SNR) of individual frequency elements. In this work, a single comb line, designed to be located at a frequency of 1 MHz, is recorded for a duration of 840 seconds, achieving a spectral resolution of 1.19 mHz. The retrieved spectrum is depicted as blue dots in Fig. S1. The linewidth, quantified by the full width at half maximum (FWHM) of the down-converted RF comb, is estimated to be well below 1.19 mHz. This result confirms the high mutual coherence of the comb teeth in our system, which directly contributes to its remarkable sensitivity and long-term stability.


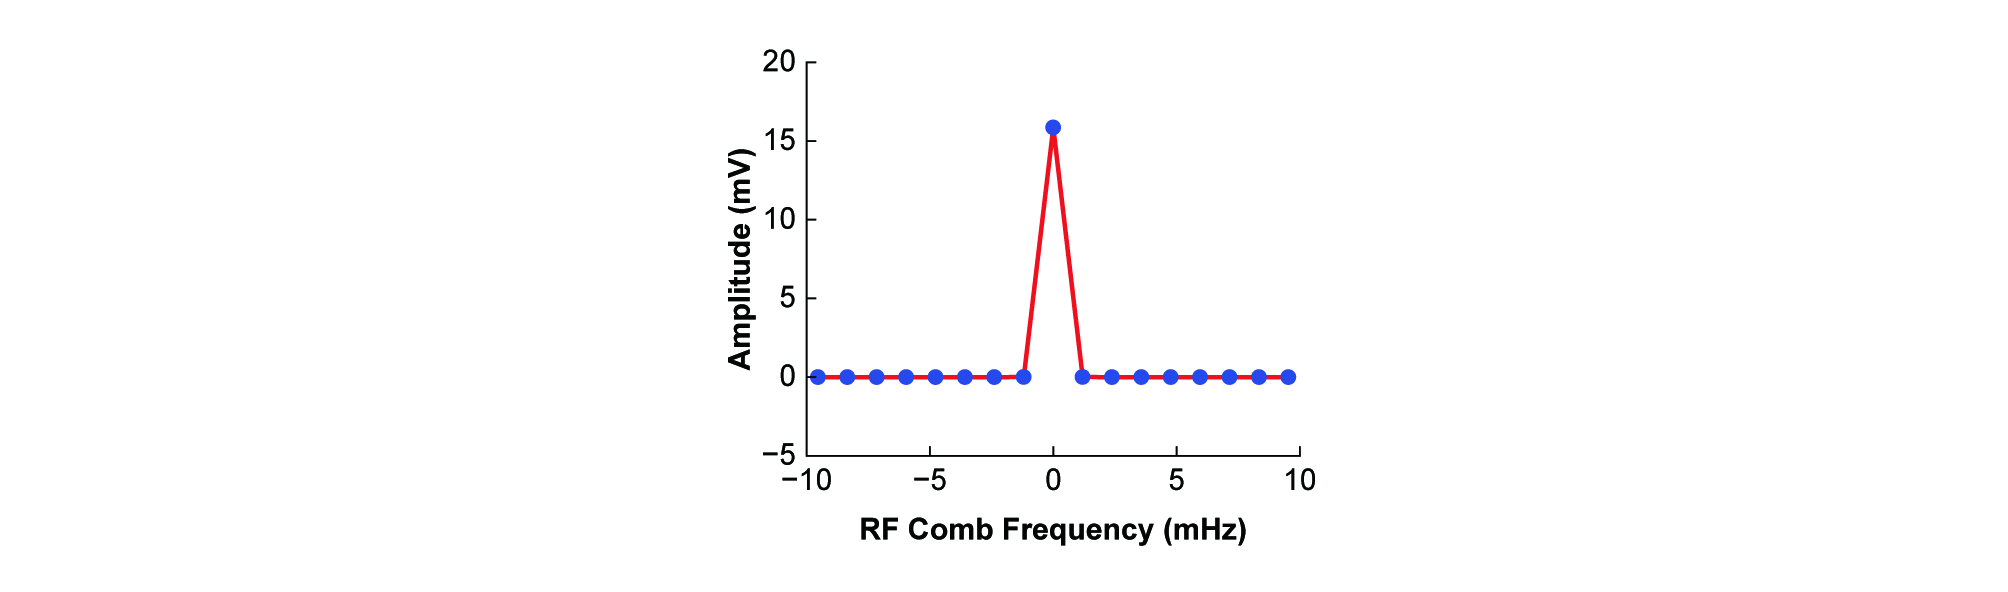


**Fig. S1. Measured RF spectrum of an individual line.** The frequency resolution of the spectrum is 1.19 mHz. No discernible profile has been observed in the curve, indicating the linewidth is much narrower than the frequency resolution.

## Supplementary Note 3. Theoretical model with consideration of cross-talk

As outlined in the main context, the modulation process introduces cross-talk, which complicates the RF comb structure. This occurs because the RF comb teeth at Δ*fk* arise not only from *fk*+1 - *fk*, but also from the contributions of higher-order modulation sidebands.

Fig. S2a presents the operational architecture of a single-sideband phase modulator (SSM). The design integrates two Mach-Zehnder modulators (MZM) in a parallel configuration, separated by a π/2 phase bias. Conceptually, each MZM is modeled as a pair of phase modulators driven by RF input signals with a π/2 phase difference, while an additional π phase shift is applied between the phase modulators. When a continuous-wave (CW) laserwith angular frequency of *ω*0 is input to the SSM, which is driven by multi-frequency modulation signals at angular frequencies *ω*1, *ω*2, …, *ωm*, the output in each path inside the SSM can be represented as:

Here, *β* is the modulation index for each frequency component. The amplitude and modulation index are assumed identical for all modulation frequencies. Applying the Bessel expansion theory ei*β*sin(*θ*) = ∑**∞** *n*=-∞*Jn*(*β*)ei*nθ*, the electric field in each optical path can be described as:

Here, *nj* denotes the *n*-th order sideband of the *j*-th comb tooth. The superimposed signal at the output of the SSM is given by:

For clarity, we define *Ω* = ∑*m* *j*=1*njωj* and *N* = ∑*m* *j*=1*nj*.


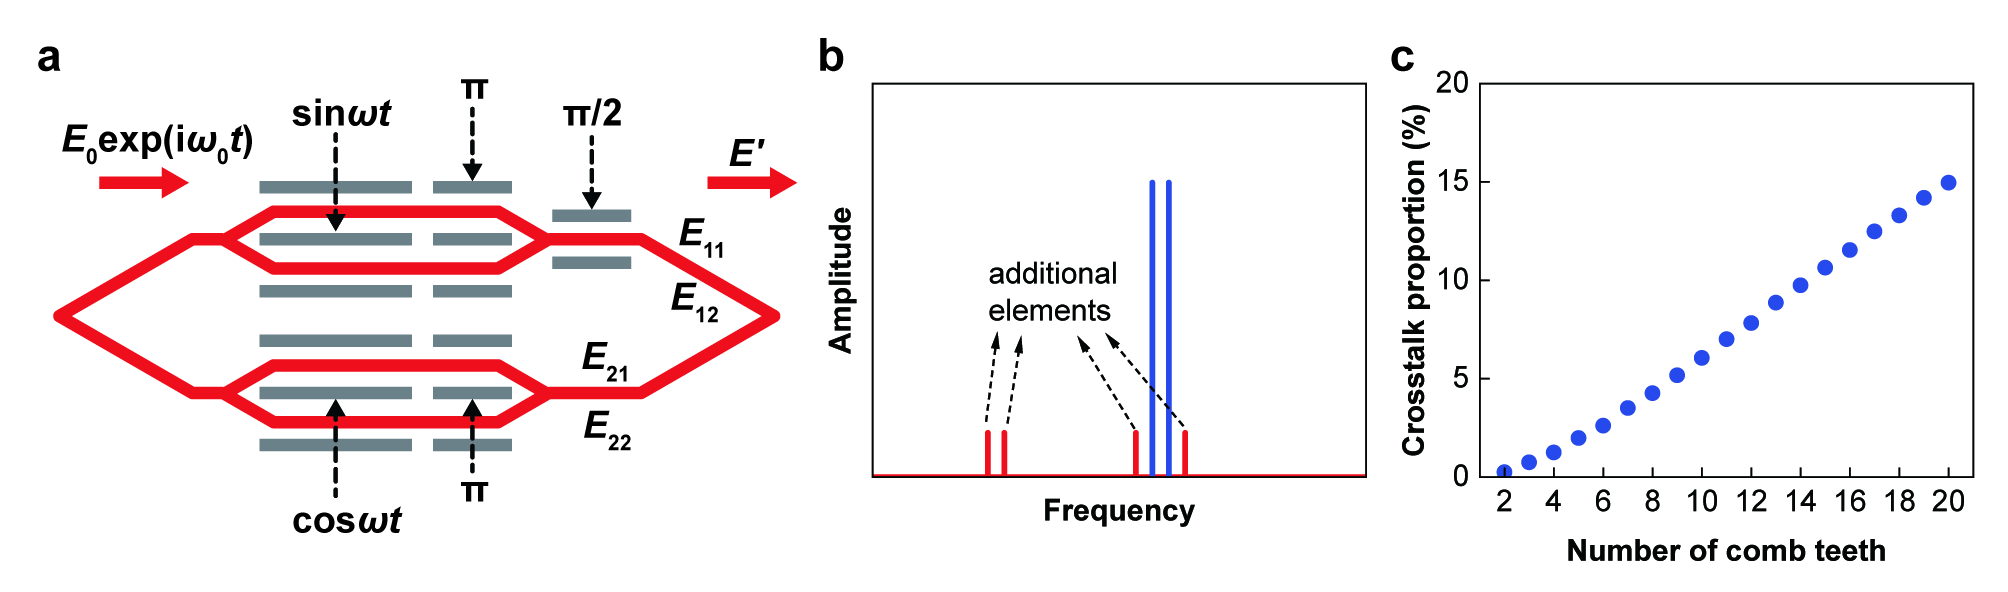


**Fig. S2.** **Theoretical Framework of comb generation with cross-talk.** **a** Operational principle of the SSM. The two RF inputs exhibit a π/2 phase difference, while the four optical paths are biased with phase shifts of π and π/2. **b** Simulated optical spectrum for dual-frequency modulation at a modulation index of *β* = 1, truncated at the second-order sidebands. The suppressed carrier generated by single-sideband phase modulator (SSM) is positioned at the center. Desired comb teeth and crosstalk components are highlighted in blue and red, respectively. **c** Crosstalk amplitude ratio as a function of the number of comb teeth.

The optical intensity detected by the photodetector is given by *I′*∝*E′**·*E′*. The dominant contribution to the *k*-th teeth of the RF comb arises under the condition *nk* = 1, *nj|j*≠*k* = 0 and *nk*+1 = 1, *nj|j*≠*k*+1 = 0, yielding:

However, when the condition *nk* = 1, *nj|j*≠*k* = 0 and *nk* = 2, *nk*+1 = -1, *nj|j*≠*k*,*k*+1 = 0 is used, it becomes:

This result indicates that the beat notes from higher-order sidebands can also contribute to the *k*-th RF teeth, which is a manifestation of cross-talk.

To further clarify and quantify the influence of the cross-talk, we consider a simple scenario, where dual-frequency modulation is executed. Under this condition, Eq. is changed to:

Fig. S2b illustrates the spectrum using a relatively large *β* of 1 to highlight the additional elements introduced by phase modulation. The amplitude of the spectral component at frequency |*ω*1-*ω*2| can be formulated as:

Here, the first item is the expected contribution and the last two are the total cross-talk.

For our current case where *β* = 0.1, then *J*0 = 0.9975, *J*1 = 0.0499, *J*2 = 0.0012, this leads to 8*J*0*J*0*J*1*J*1 = 0.0199, 8*J*1*J*1*J*2*J*2 = 3.1120×10-8, -16*J*0*J*1*J*1*J*2 = -4.9709×10-5. This means the cross-talk arises a deviation of the magnitude of the RF teeth of 0.25%.

Fig. S2c illustrates the magnitude deviation as a function of the number of modulation frequencies. As the number of frequencies increase, the deviation also rises. Although the fitting model based on Eq. —which accounts for cross-talk—effectively mitigates its impact on retrieved concentration, drift in the modulation amplitude, which determines the value of *β*, causes variation in cross-talk and consequently alters the spectral model.

In summary, to minimize these detrimental effects, the modulation index is maintained below 0.1 and the number of comb teeth is typically limited to a few dozen.

## Supplementary Note 4. A comprehensive performance comparison with state-of-the-art DCS systems

Table S1 presents a comprehensive performance comparison between our spectrometer and state-of-the-art DCS systems, with the detection sensitivity (*α*min) values highlighted in red for emphasis. The intrinsic mutual coherence of the proposed comb is the key factor enabling a sensitivity improvement of over an order of magnitude. Furthermore, in our system, the measured SNR of an individual comb tooth (column 7) corresponds exactly to the reciprocal of the retrieved sensitivity. This direct relationship stems from the uniform power distribution across the comb teeth and the dominance of stochastic noise in the system.

| **Ref.** | **Spectral region** | **Spectral coverage** | **Total power (mW)** | **FOM (Hz1/2)** | **Power per teeth(μW)** | **SNR (Hz1/2)** | ***α*min (Hz-1/2)** | **Phase compensation** |
| --- | --- | --- | --- | --- | --- | --- | --- | --- |
| This work | NIR | 4 GHz | 0.02 | 4×106 | 1 | 2.0×105 | 5.0×10-6 | × |
| 28 | NIR | / | 47 | 7.2×107 | 1 | / | 2×10-3 | With post processing |
| 22 | NIR | 60 GHz | / | 1.3×106 | 180 | 1.1×104 | 2.2×10-4 | × |
| 27 | NIR | 0.68 THz | 580 | 3.5×107 | 210 | 1.2×104 | 1.3×10-4 | With post processing |
| MIR | 0.65 THz | 320 | 3.5×108 | 160 | 1.0×105 | 5.6×10-5 |
| 35 | NIR | 2.5 THz | 0.01 | >1.0×107 | 0.004 | / | 3.5×10-4 | Phase locking + Post processing + Squeezed light |
| 23 | NIR | 36 GHz | / | 1.5×106 | / | 8.1×103 | / | × |
| 34 | NIR | ~10 GHz | / | / | / | / | 2.1×10-4 | With post processing |
| 52 | MIR | 0.36 THz | 150 | / | 0.42 | 2.3×104 | 1.9×10-3 | × |

**Table S1. Performance comparison between our spectrometer and state-of-the-art DCS systems for gas-phase absorption spectroscopy.**

Besides mutual incoherence, the feeble power per comb tooth poses another major constraint on sensitivity, as it allows the spectral signal to be overwhelmed by detector noise. To decouple this factor and specifically highlight the advancement afforded by our approach to mutual coherence, we define a new performance parameter: the product of sensitivity and power per teeth, with units of Hz-1/2‧μW. As plotted in Fig. S3, our system outperforms the majority of state-of-the-art DCS systems by at least a factor of 80. The only exception is the system reported in Ref. 35, which achieved its exceptional performance through an extensive suite of noise suppression techniques. These included phase locking and post-processing to mitigate mutual incoherence, balanced detection to minimize detector noise and intensity noise, and the use of squeezed light to break the shot noise limit. Notably, even when benchmarked against this sophisticated setup, the performance of our spectrometer is only a factor of 3.6 lower.


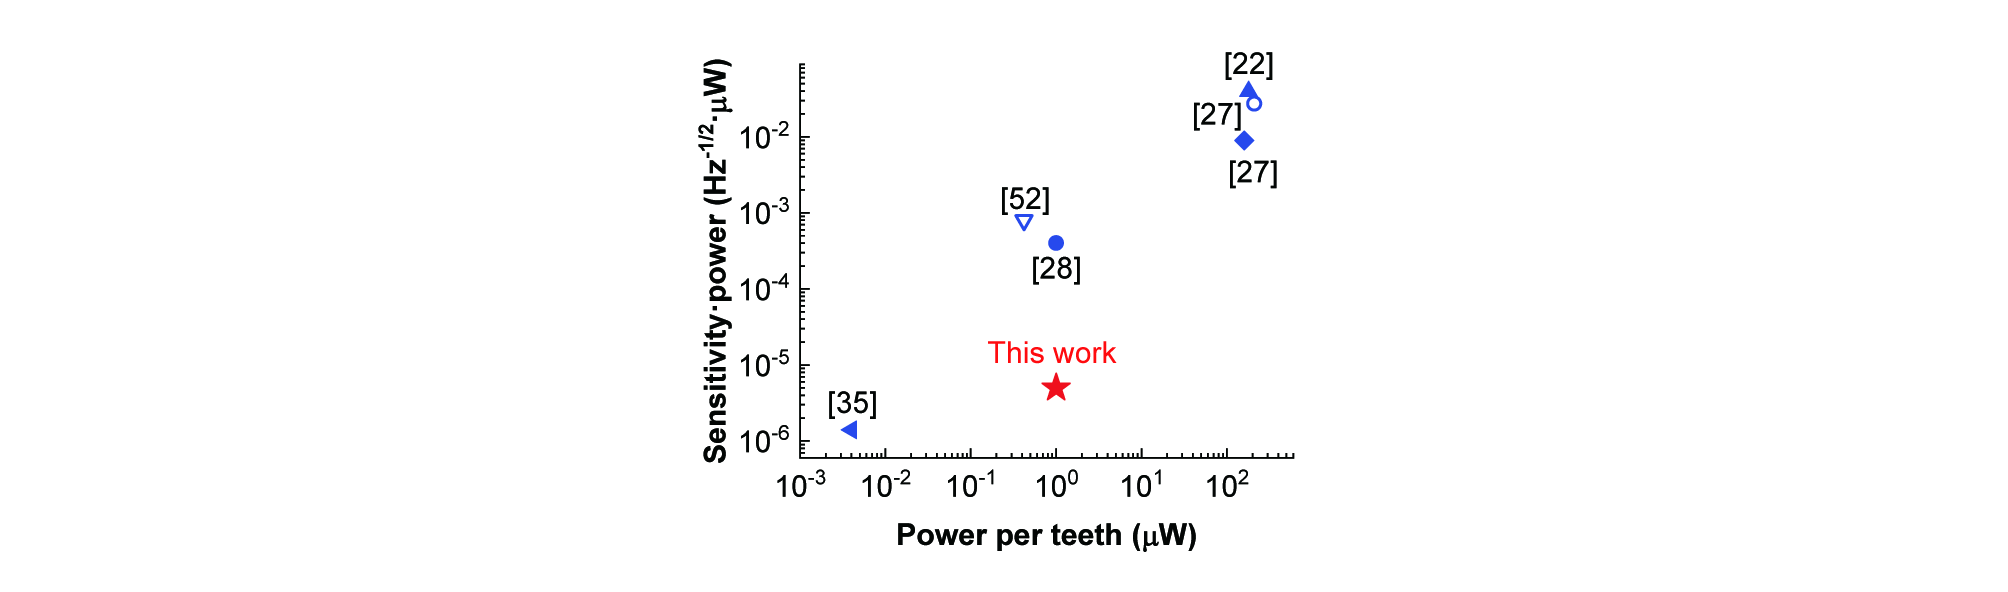


**Fig. S3. Comparison of sensitivity–power products across state-of-the-art DCS systems and the proposed spectrometer.**

## Supplementary Note 5. Calculation of the shot-noise limited sensitivity

The fundamental sensitivity of the system is determined by its shot noise limit. Within this framework, the photocurrent generated by the detector follows the expression

where *η*c denotes the responsivity of the photodiode (A/W) and *P* is the incident optical power in the absence of absorption. With gas absorption is present, the detected photocurrent for each comb tooth becomes

where *P*0 is the power of a single tooth without absorption, *α*0(*k*) represents the gas absorption contribution, defined as *α*0(*k*)=[*α*(ν*k*)+*α*(ν*k*+1)]/2. The total detected signal can be decomposed into two contributions: the non-absorption background *I*B, and the absorption-induced components *I*A. The corresponding shot noise current is expressed as

where e denotes the electron charge, and Δ*f*b represents the detection bandwidth. Setting the absorption signal equal to the shot noise current, i.e. *I*A = *i*shot, yields the fundamental shot noise limit:

where *n*+1 is the total number of optical frequency teeth.

## Supplementary Note 6. Impact of active frequency stabilization of the laser carrier

The fiber laser in free-running mode exhibits a discernible frequency drift. As illustrated in the upper panel of Fig. S4a, long-term monitor over 4000 seconds reveals a frequency drift of approximately 20 MHz. The abrupt shifts observed in the curve are likely attributable to variations in the temperature control of the fiber cavity within the laser. The simultaneously retrieved and averaged absorption, derived from the measured spectra, is depicted in the lower panel. Evidently, jumps in the absorption trace align with these sudden frequency changes. These jumps arise from fitting errors induced by the finite number of comb teeth, which inevitably degrade signal measurement accuracy.


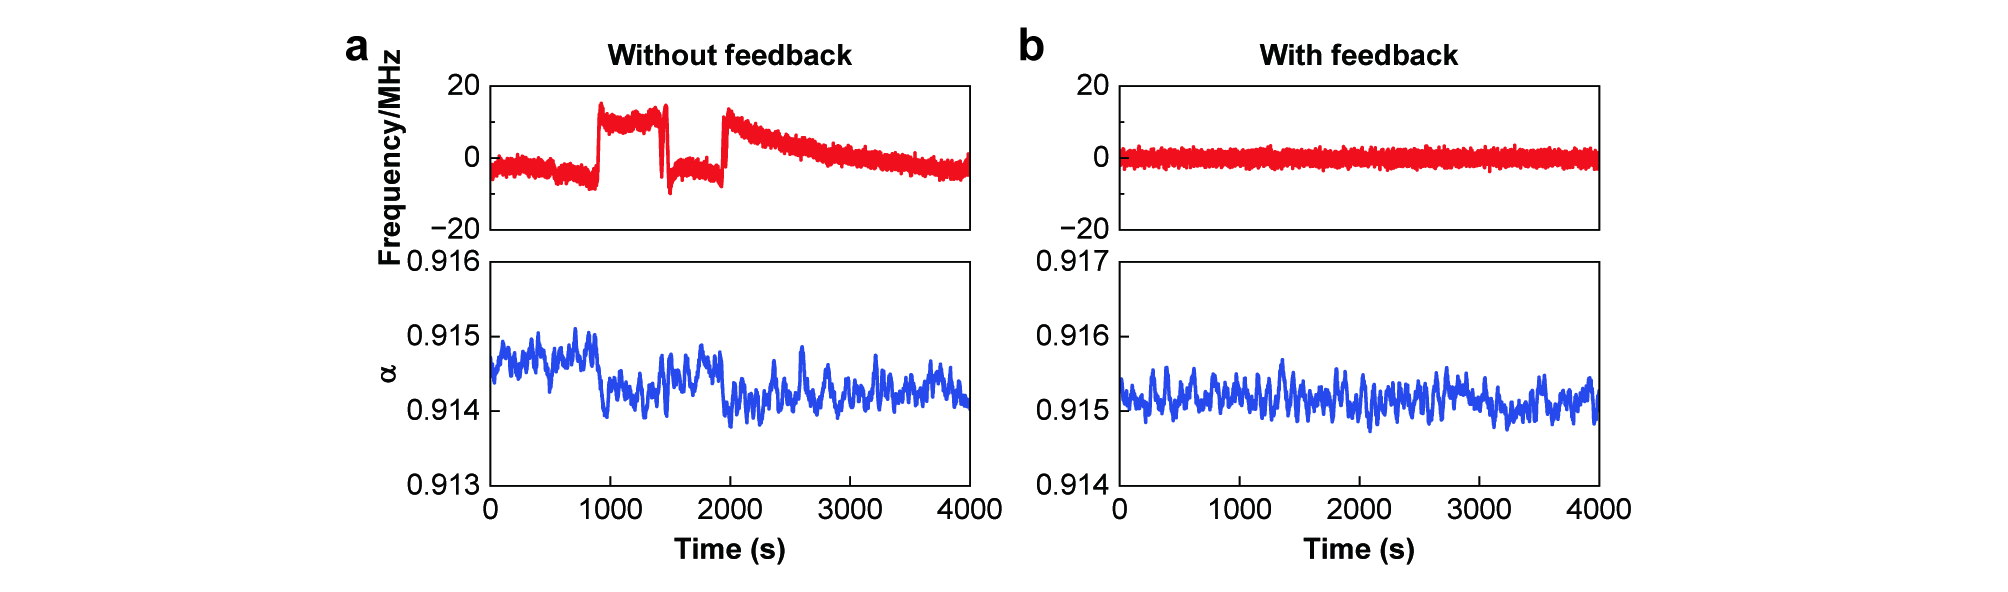


**Fig. S4.** **The influence of laser frequency drift on concentration measurement.** **a** The upper and lower panels show the long-term drift of the absorption line center and the corresponding absorption coefficient without feedback, respectively. **b** The upper and lower panels show long-term stability of the absorption line center and the corresponding absorption coefficient with active feedback, respectively.

To mitigate this issue, a feedback control loop was implemented to actively stabilize the laser frequency. The error signal for this loop is derived from the symmetry of the amplitudes of the two comb teeth flanking the absorption peak and is fed back to control the piezoelectric transducer (PZT) of the laser, thereby stabilizing the carrier frequency. The upper panel in Fig. S4b shows the laser frequency over 4000 s with active locking enabled, exhibiting a flat profile with variations confined to within 5 MHz. Consequently, fluctuations in the retrieved absorption are suppressed, achieving a deviation of 1.56×10-4, an improvement by a factor of 1.64 times compared to the unlocked case.
